# Supplementary material for: Oscillating glucose induces microRNA-185 and impairs an efficient antioxidant response in human endothelial cells
Source: Springer Nature journal article supplement (doi:10.1186/s12933-016-0390-9), 2016-04-30
Supplement: MOESM1 [file 10111224]

## Supplemental 1 (S1)

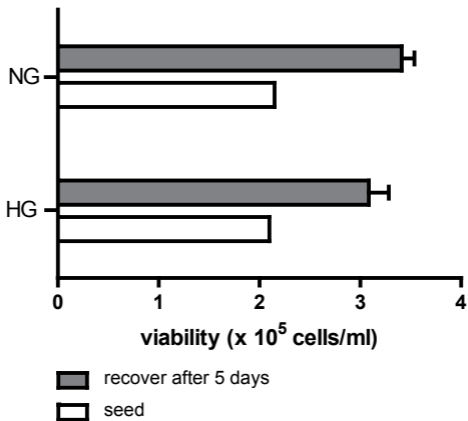

S1. The cells viability after 5 days of exposures to glucose.
